# Supplementary material for: Heterogeneous hydroformylation of internal alkenes over a defect-laden hexagonal BN supported RhCo alloy: reaction performance modulated by N vacancies
Source: Royal Society of Chemistry journal article supplement (doi:10.1039/d4cy01252f), 2024-11-21
Supplement: d4cy01252f1.pdf [file d4cy01252f1.pdf]

## Supplementary Information

### Heterogeneous hydroformylation of internal olefins over *dh*-BN supported RhCo alloys: Reaction performance modulated by N vacancies

Bowen Qiu, [a, b] Shujuan Liu, [a] Shimin Liu, [a] Xinjiang Cui [a] Dongcheng He,  
[a] Kang Zhao, [a] Bin Wang, [a] and Feng Shi\*[a]

[a] Bowen Qiu, Shujuan Liu, Dongcheng He, Bin Wang, Prof. Dr. X. Cui, and Prof. Dr. F. Shi,  
State Key Laboratory for Oxo Synthesis and Selective Oxidation, Lanzhou Institute of Chemical  
Physics, Chinese Academy of Sciences, No.18, Tianshui Middle Road, Lanzhou, 730000, People's  
Republic of China

[b] Bowen Qiu, University of Chinese Academy of Sciences, No. 19A, Yuquanlu, Beijing,  
100049, People's Republic of China

\*Corresponding author: Feng Shi: [fshi@licp.cas.cn](mailto:fshi@licp.cas.cn)

## 1. Experimental

All chemicals are used without further purification. BN are purchased from Fujian Schnorrall New Material Co.,  $\text{Co}(\text{NO}_3)_3 \cdot 6\text{H}_2\text{O}$ ,  $\text{Rh}(\text{acac})(\text{CO})_2$ ,  $\text{Ce}(\text{NO}_3)_2 \cdot 6\text{H}_2\text{O}$ ,  $\text{Cu}(\text{NO}_3)_2 \cdot 9\text{H}_2\text{O}$ ,  $\text{Ni}(\text{NO}_3)_2 \cdot 6\text{H}_2\text{O}$  and  $\text{FeCl}_3$  is purchased from Innochem, and Isopropanol (AR) are purchased from Kermel (Tianjin, China).

The substrates, including aliphatic olefins and aromatic olefins, as well as solvents, are purchased from Innochem.

### 1.1 Preparation of *dh*-BN

Pristine 1 g BN powders dispersed in 5g isopropanol are subjected to Ball-Milling to produce *dh*-BN in a planetary ball mill F-P400 with protection under argon atmosphere. The speed of planetary ball mill F-P400 with a frequency of 480 rpm. The degree of defectiveness in *dh*-BN is controlled by the Ball-Milling time. Different *dh*-BN samples with various Ball-Milling times (0, 20, 40, 120, 240 and 480 min) are prepared and named BN, *dh*-20BN, *dh*-40BN, *dh*-120BN, *dh*-240BN and *dh*-480BN, respectively. Structural pulverization and amorphization of *dh*-BN is commensurate with the Ball-Milling time.

### 1.2 Typical Procedure for Preparation of RhCo/*dh*-BN Catalyst

In a typical preparation,  $\text{Rh}(\text{acac})(\text{CO})_2$  (0.070 g, 0.2 mmol) and  $\text{Co}(\text{NO}_3)_2 \cdot 6\text{H}_2\text{O}$  (0.175 g, 0.6mmol) are added to  $\text{H}_2\text{O}$  (4 mL) at room temperature and stirred until complete dissolution. Then, *dh*-120BN (0.1 g) is added and the mixture is stirred for a further 24 h at room temperature. Afterward, centrifuge the solvent of the suspension and vacuum dry the solid at 100 °C for 8 hours. The obtained solid was then calcined under  $\text{H}_2$  at 250 °C for 2 h to afford RhCo/*dh*-BN. To prepare other catalysts, the solution is changed to  $\text{Ce}(\text{NO}_3)_2 \cdot 6\text{H}_2\text{O}$ ,  $\text{Cu}(\text{NO}_3)_2 \cdot 3\text{H}_2\text{O}$ ,  $\text{Ni}(\text{NO}_3)_2 \cdot 6\text{H}_2\text{O}$  and  $\text{Fe}(\text{NO}_3)_3 \cdot 9\text{H}_2\text{O}$  metal precursor, and the rest steps remained the same.

### 1.3 Typical Procedure for Hydroformylation of 2-Octene

A mixture of RhCo/*dh*-BN catalyst (10 mg), 2-octene (0.224 g, 2.0 mmol), and toluene (2.0 mL) is added into a stainless-steel autoclave (100 mL) with a magnetic stir bar. After the autoclave is sealed and purged with CO three times, the pressure of syngas ( $\text{CO}/\text{H}_2 = 1:1$ ) is adjusted to 6.0 MPa. Then the reaction mixture is stirred at 90 °C for 12 h. After the reaction finished, the autoclave is cooled to room

temperature, and the pressure is carefully released. Subsequently, the catalyst is removed from the system by centrifugation and analyzed by gas chromatography (Agilent 7890A GC equipped with an HP-5 capillary column the FID detector). Finally, the yield and regioselectivity are obtained by GC analysis using decane as the internal standard.

For recycling, the catalyst was separated by centrifugation, dried under vacuum at 100 °C for 6 h and used directly for the next run. For Hot Filtration, after 6 h of reaction, cool to room temperature, slowly release the pressure, separate the catalyst from the upper solution, and determine the product in the supernatant by gas chromatography. The remaining solution was transferred into a clean autoclave, pressurized with H<sub>2</sub> and CO, and heated again.

The TOF of product were calculated using the following equations:

$$TOF = \frac{n_{product}}{n_{Rh} \times h}$$

Where  $n_{product}$  is the number of moles of generated product,  $n_{Rh}$  is the number of moles of metallic Rh in practical loading, and  $h$  is the reaction time.

#### 1.4 Physical characterization

Gas chromatography analysis is performed on Agilent 7890A GC equipped with an HP-5 capillary column and FID detector. GC-MS analysis is in general recorded on an Agilent 5977A MSD GC-MS.

TEM is carried out by using a Tecnai G2 F30 S-Twin transmission electron microscope operating at 300 kV. Single-particle EDX analysis is performed by using a Tecnai G2 F30 S-Twin Field Emission TEM in STEM mode. For TEM investigations, the catalysts are dispersed in ethanol by ultrasonication and deposited on carbon-coated molybdenum grids.

XRD measurements are conducted by a STADIP automated transmission diffractometer (STOE) equipped with an incident beam curved germanium monochromator selecting Cu K $\alpha$ 1 radiation and a 6 ° position sensitive detector (PSD). The XRD patterns are scanned in the 2 $\theta$  range of 10-80°. For the data interpretation, the software WinXpov (STOE) and the database of Powder Diffraction File (PDF) of the International Centre of Diffraction Data (ICDD) are used.

XPS is obtained using a VG ES-CALAB 210 instrument equipped with a dual Mg/Al anode X-ray source, a hemispherical capacitor analyzer, and a 5 keV Ar<sup>+</sup> ion gun. The electron binding energy is referenced to the C 1s peak at 284.8 eV. The

background pressure in the chamber was less than  $10^{-7}$  Pa. The peaks are fitted by Gaussian–Lorentzian curves after linear background subtraction. For quantitative analysis, the peak area is divided by the element-specific Scofield factor and the transmission function of the analyzer.

The contents of Rh/Co in the catalysts are measured by inductively coupled plasma-atomic emission spectrometry (ICP-AES), using an Iris Advantage Thermo Jarrel Ash device.

Nitrogen adsorption-desorption isotherms are measured at 77 K using American Quantachrome iQ2 automated gas sorption analyzer. The pore-size distribution is calculated by Barrett, Joyner, and Halenda (BJH) method from desorption isotherm.

IR-diffuse reflectance spectra (IR) of samples are analyzed by a Bruker VERTEX 70 FTIR spectrometer.

The electron paramagnetic resonance (EPR) measurements of LCO solid samples are carried out on a JEOL JES-FA200 spectrometer.

## **2. N<sub>2</sub> adsorption-desorption analysis**

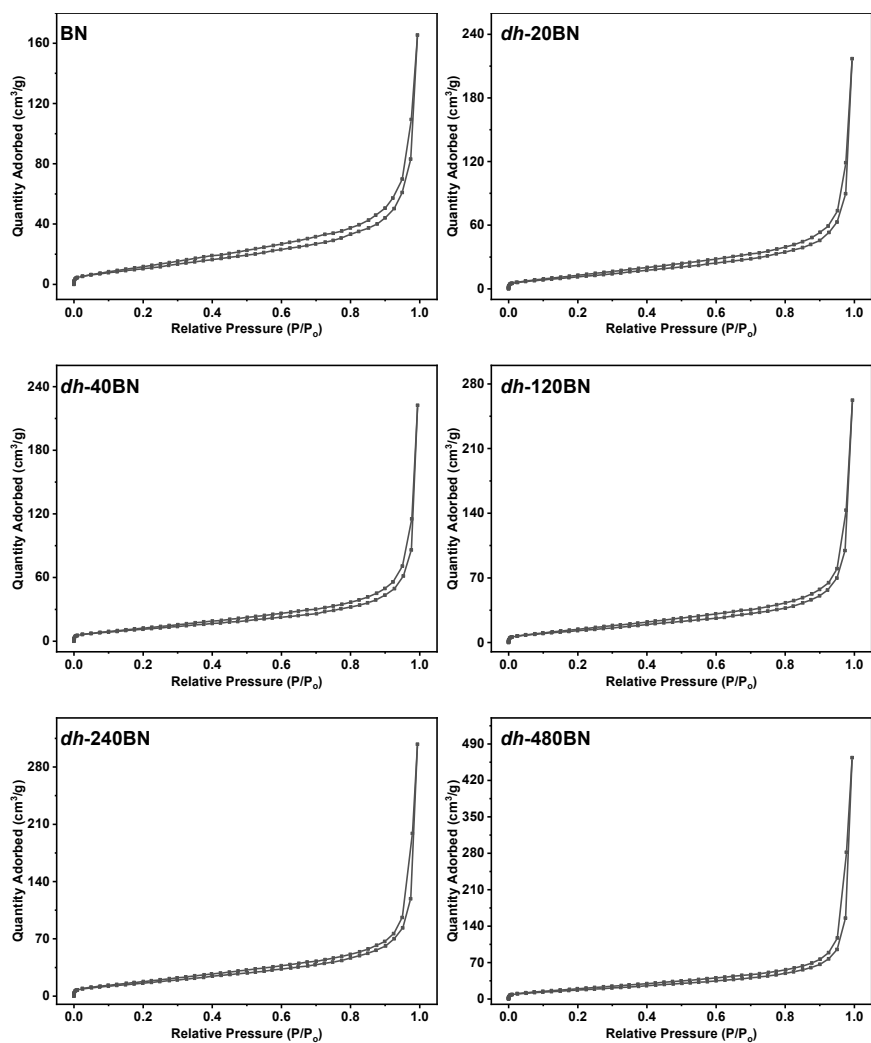

Figure S1 N<sub>2</sub> adsorption-desorption isotherm of the BN and *dh*-BN.

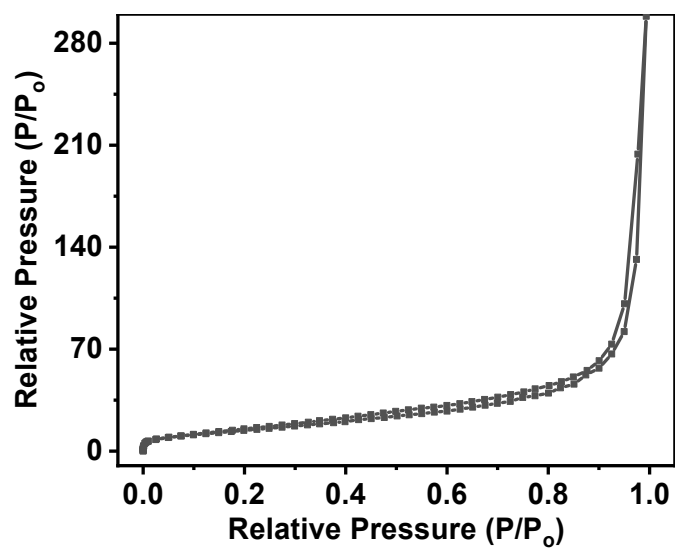

Figure S2 N<sub>2</sub> adsorption-desorption isotherm of the RhCo/*dh*-BN catalyst.

Table S1 The physical properties of catalysts.

| Entry | Catalyst            | SA (m <sup>2</sup> g <sup>-1</sup> ) | APW (nm) | PV (mm <sup>3</sup> g <sup>-1</sup> ) |
|-------|---------------------|--------------------------------------|----------|---------------------------------------|
| 1     | BN                  | 44                                   | 0.70     | 256.4                                 |
| 2     | <i>dh</i> -20BN     | 47                                   | 0.70     | 336.3                                 |
| 3     | <i>dh</i> -40BN     | 54                                   | 0.70     | 358.8                                 |
| 4     | <i>dh</i> -120BN    | 56                                   | 1.56     | 405.8                                 |
| 5     | <i>dh</i> -240BN    | 60                                   | 1.56     | 476.1                                 |
| 6     | <i>dh</i> -480BN    | 64                                   | 1.65     | 716.9                                 |
| 7     | RhCo/ <i>dh</i> -BN | 53                                   | 1.66     | 461.8                                 |

Determined by an IQ<sub>2</sub> automated gas sorption analyzer. SA: BET surface area; APS: average pore radius;

PV: pore volume.

### 3. X-Ray Diffraction analysis

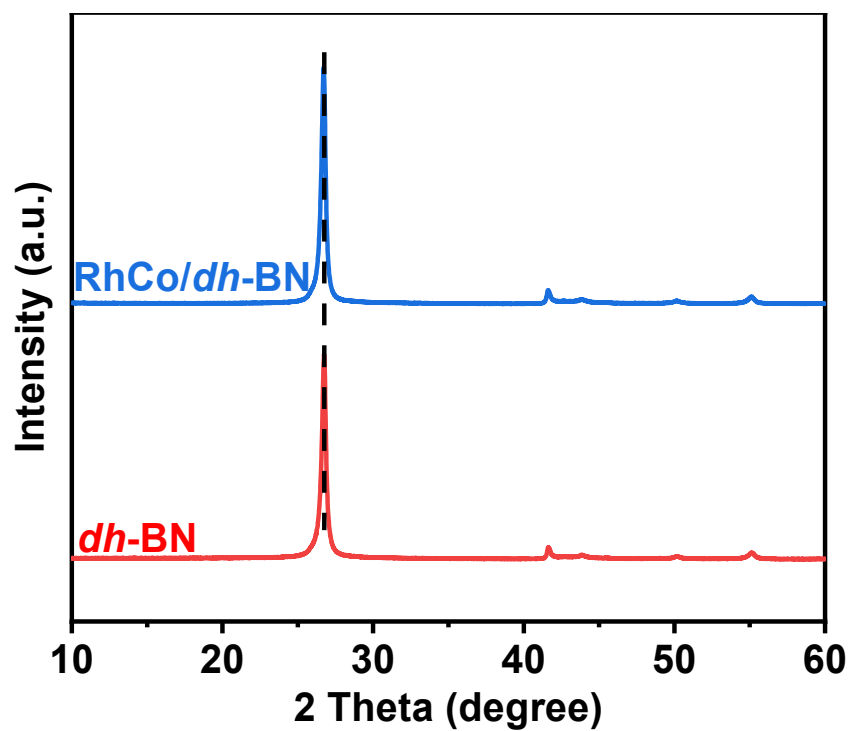

Figure S3 XRD patterns of the samples for *dh*-BN and RhCo/*dh*-BN.

#### 4. X-ray photoelectron spectroscopy analysis

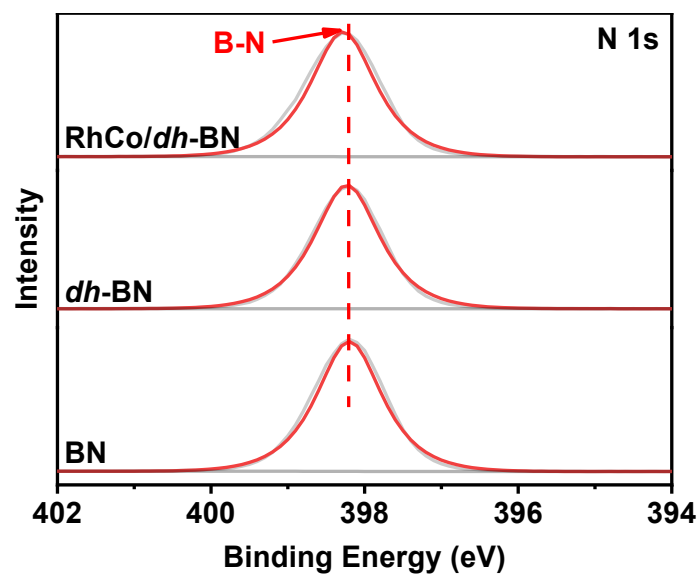

Figure S4 N1s XPS analysis for the catalyst.

## 5. Transmission electron micrographs

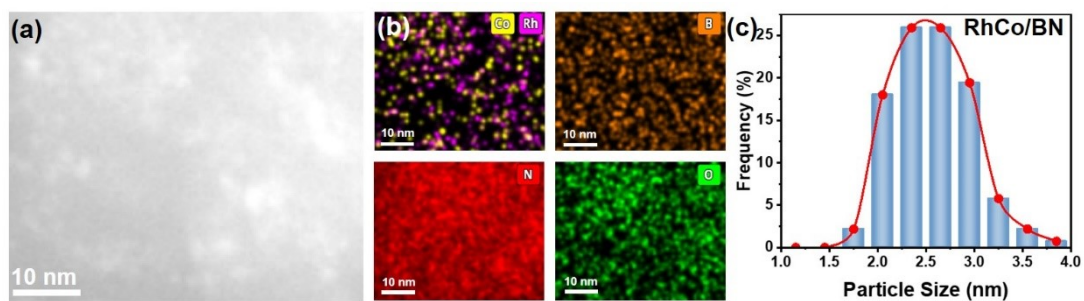

Figure S5 Morphology of RhCo/BN. (a) HAADF- STEM images, (b) EDX elemental mapping, (c) Particle size distribution histogram.

## 6. Summary of heterogeneous hydroformylation reports in literature

Table S2 Comparison the catalytic performance for hydroformylation of alkenes presented in literatures and this work.

| Entry | Catalyst                                                  | Substrate  | T (°C) | t (h) | P (MPa) | Con./Yield (%) | Sel. (%) | L/B   | TOF (h <sup>-1</sup> ) | Ref.      |
|-------|-----------------------------------------------------------|------------|--------|-------|---------|----------------|----------|-------|------------------------|-----------|
| 1     | Rh/RGO                                                    | 1-hexene   | 100    | 1     | 5       | 100            | 72       | 44/56 | 508                    | [1]       |
| 2     | Rh@UiO-66                                                 | 1-octene   | 100    | 21    | 5       | >99            | 73       | 36/64 | 226                    | [2]       |
| 3     | CoRhHT                                                    | 1-octene   | 100    | 6     | 5       | 98             | 96       | 36/64 | 6                      | [3]       |
| 4     | Rh@CTF                                                    | 1-octene   | 80     | 20    | 8       | 68             | 63       | 66/34 | 107                    | [4]       |
| 5     | Rh/POL-dppe                                               | 1-octene   | 50     | 24    | 1       | 97             | 100      | 29/71 | 30                     | [5]       |
| 6     | Rh-Co-Pi/ZnO                                              | 1-decene   | 100    | 6     | 4       | 97             | 89       | 56/44 | 988                    | [6]       |
| 7     | Rh/ZnO@ZIF-8                                              | 1-dodecene | 90     | 4.5   | 4       | 99             | 77       | 48/52 | 87                     | [7]       |
| 8     | CeO <sub>2</sub> -R-Rh                                    | styrene    | 120    | 8     | 2       | 99             | 97       | 62/38 | 72                     | [8]       |
| 9     | Rh <sub>1</sub> /CeO <sub>2</sub>                         | styrene    | 120    | 12    | 3       | 99             | 72       | 47/53 | 49                     | [9]       |
| 10    | Rh-PAMAM/SiO <sub>2</sub> -Fe <sub>3</sub> O <sub>4</sub> | styrene    | 50     | 16    | 6.9     | 100            | 100      | 3/97  | 13                     | [10]      |
| 11    | Rh/CAM                                                    | 2-octene   | 100    | 5     | 5       | 88             | -        | 23/77 | 559                    | [11]      |
| 12    | Rh/Tetraphosphine                                         | 2-octene   | 125    | 1     | 1       | 84             | 84       | 98/2  | 706                    | [12]      |
| 13    | RhCo/ BN                                                  | 2-octene   | 90     | 12    | 6       | 27             | 41       | 68/33 | 106                    | This work |
| 14    | RhCo/ <i>dh</i> -BN                                       | 2-octene   | 90     | 12    | 6       | 97             | 100      | 0/100 | 923                    | This work |

Reaction conditions: the ratio of H<sub>2</sub>/CO =1:1.

TOF =Moles of converted substrate \*(Moles of Rh)<sup>-1</sup> \*(Reaction time h)<sup>-1</sup>.

## 7. Reaction optimization in hydroformylation of 2-octene.

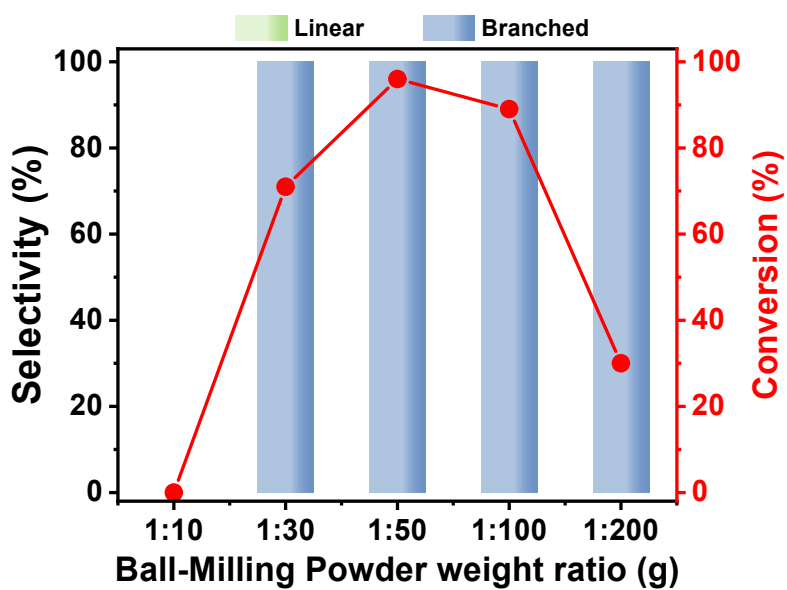

Figure S6 The number of balls optimization in hydroformylation of 2-octene.

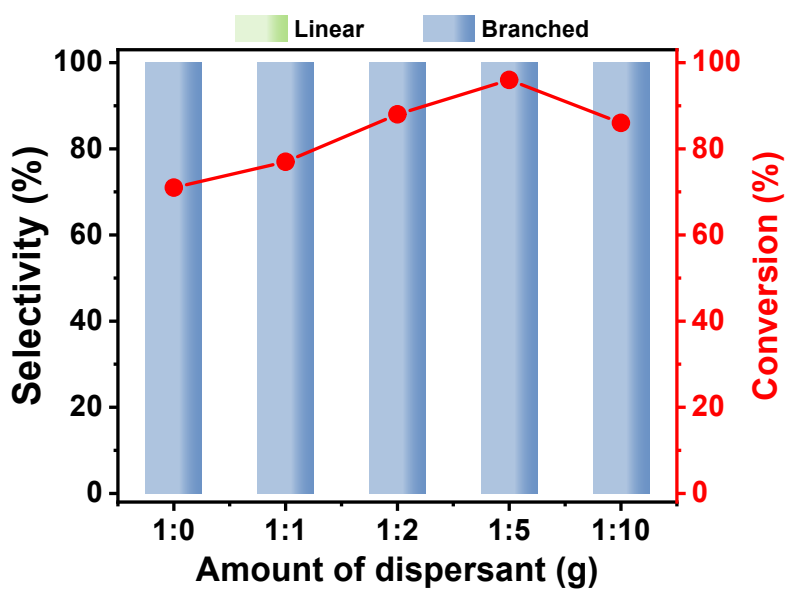

Figure S7 The amount of dispersant optimization in hydroformylation of 2-octene.

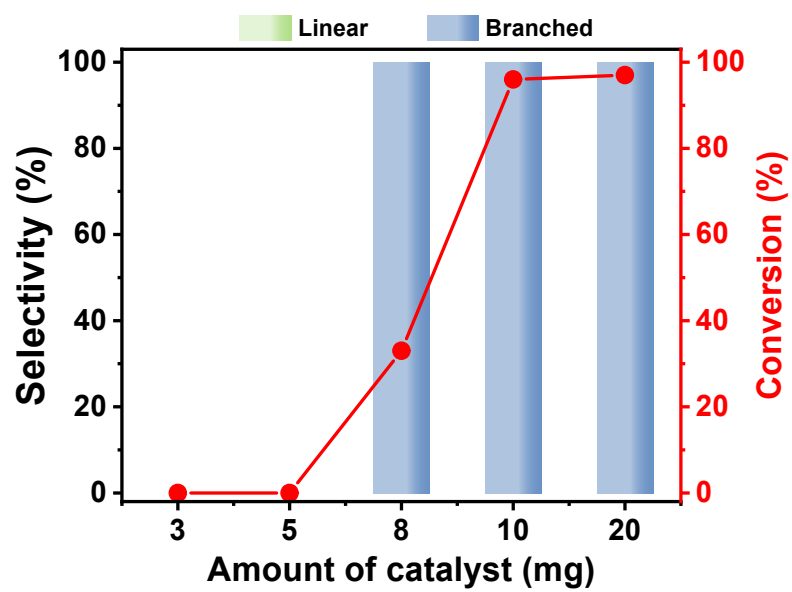

Figure S8 The amount of catalyst optimization in hydroformylation of 2-octene.

## 6. Characterization of RhCo/*dh*-BN used

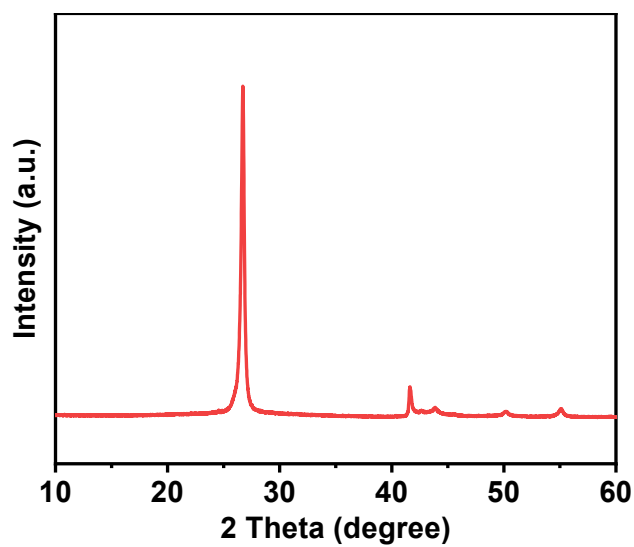

Figure S9 XRD patterns of the samples for RhCo/*dh*-BN used.

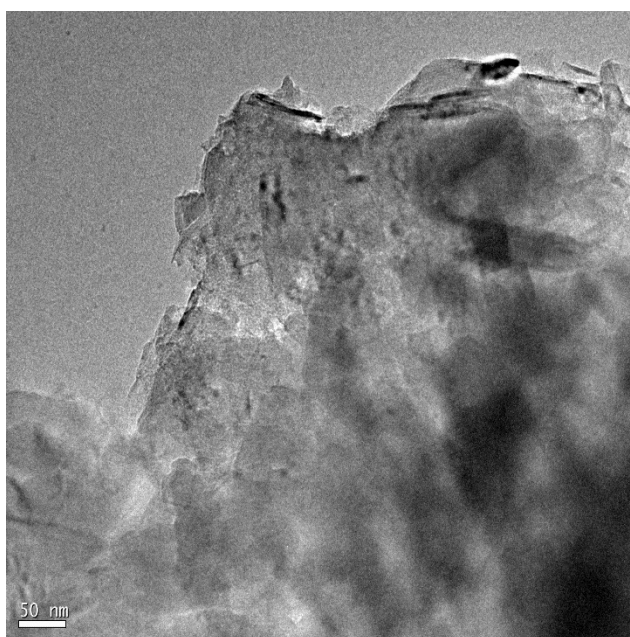

Figure S10 TEM images of the RhCo/*dh*-BN used catalysts.

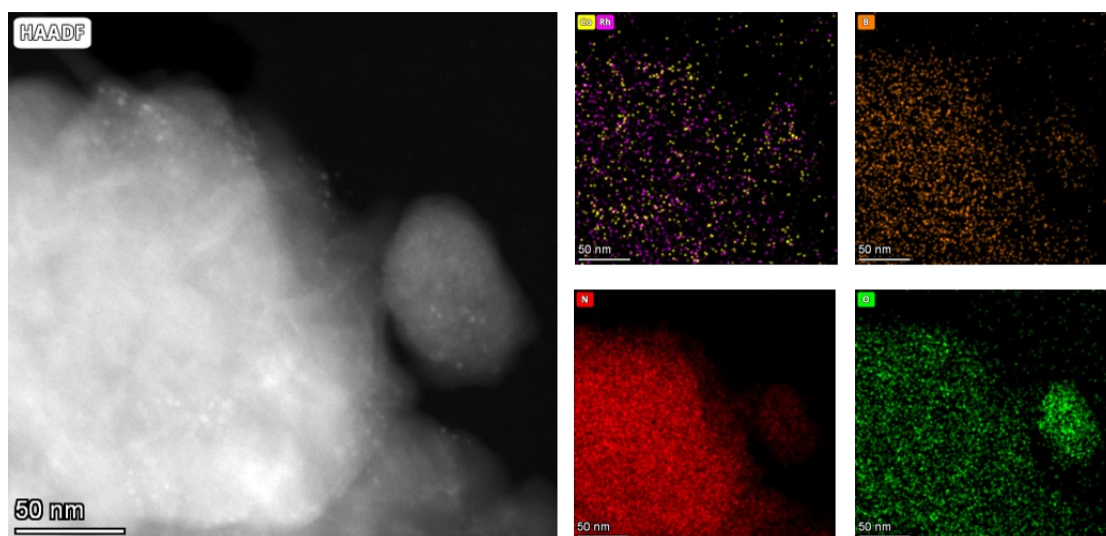

Figure S11 STEM-HAADF images and EDX elemental mapping.

Table S3 Determination of metal content by ICP

| Entry | Catalyst                  | Rh (wt.%) | Co (wt.%) |
|-------|---------------------------|-----------|-----------|
| 1     | RhCo/ <i>dh</i> -BN-Fresh | 0.18      | 0.18      |
| 2     | RhCo/ <i>dh</i> -BN-Used  | 0.18      | 0.18      |

## 7. Quantitative GC spectra of the products

### Product (1)

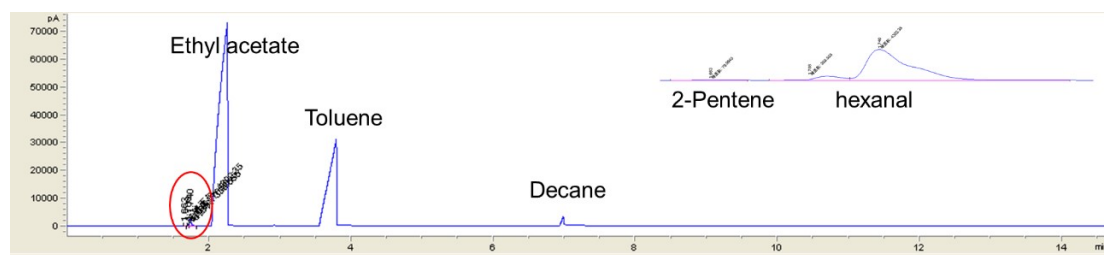

| Peak No. | Ret. time | Area   | Area%    |
|----------|-----------|--------|----------|
| 1        | 1.663     | 76.1   | 1.607    |
| 2        | 1.708     | 355.6  | 7.511    |
| 3        | 1.74      | 4302.3 | 90.882   |
| Total    |           | 4734   | 100.0000 |

### Product (2)

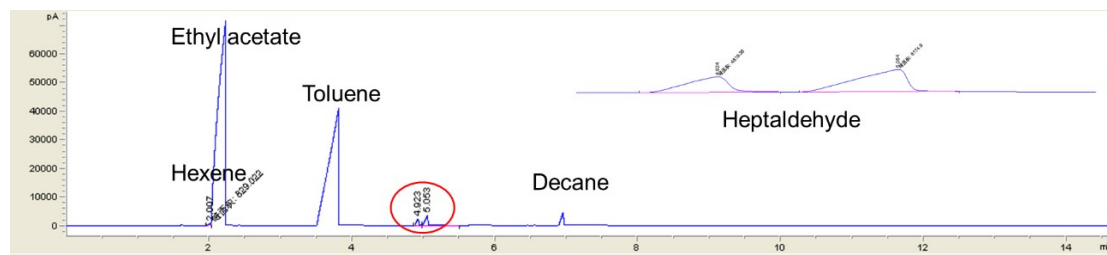

| Peak No. | Ret. time | Area    | Area%    |
|----------|-----------|---------|----------|
| 1        | 2.007     | 829     | 5.997    |
| 2        | 4.924     | 4819.4  | 34.864   |
| 3        | 5.054     | 8174.9  | 59.139   |
| Total    |           | 13823.3 | 100.0000 |

### Pruduct (3)

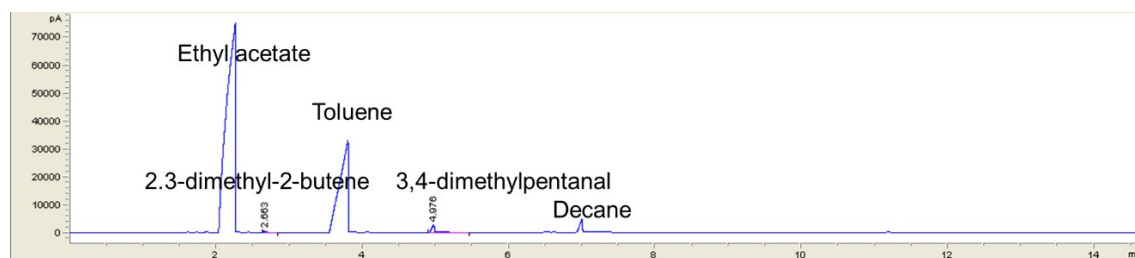

| Peak No. | Ret. time | Area   | Area%    |
|----------|-----------|--------|----------|
| 1        | 2.663     | 729.3  | 8.579    |
| 2        | 4.976     | 7771.5 | 91.421   |
| Total    |           | 8500.8 | 100.0000 |

### Pruduct (4)

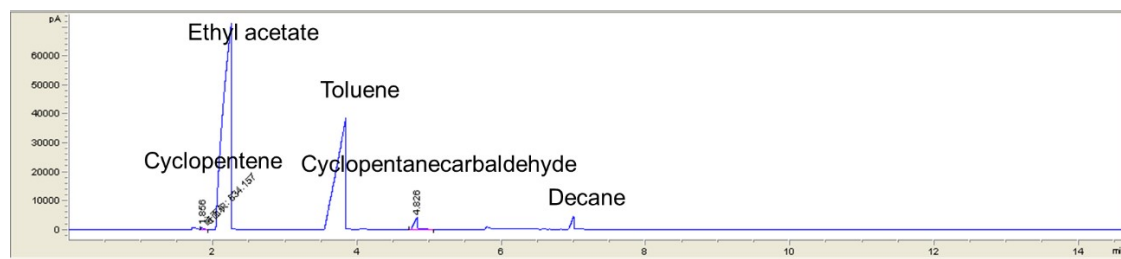

| Peak No. | Ret. time | Area    | Area%    |
|----------|-----------|---------|----------|
| 1        | 1.856     | 834.2   | 6.030    |
| 2        | 4.826     | 12998.6 | 93.970   |
| Total    |           | 13832.8 | 100.0000 |

# Pruduct (5)

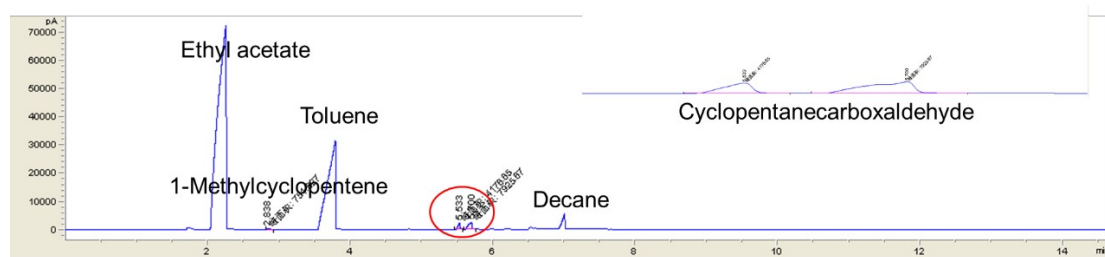

| Peak No. | Ret. time | Area    | Area%    |
|----------|-----------|---------|----------|
| 1        | 2.838     | 751.8   | 5.849    |
| 2        | 5.533     | 4176.7  | 32.493   |
| 3        | 5.7       | 7925.7  | 61.658   |
| Total    |           | 16154.2 | 100.0000 |

# Pruduct (6)

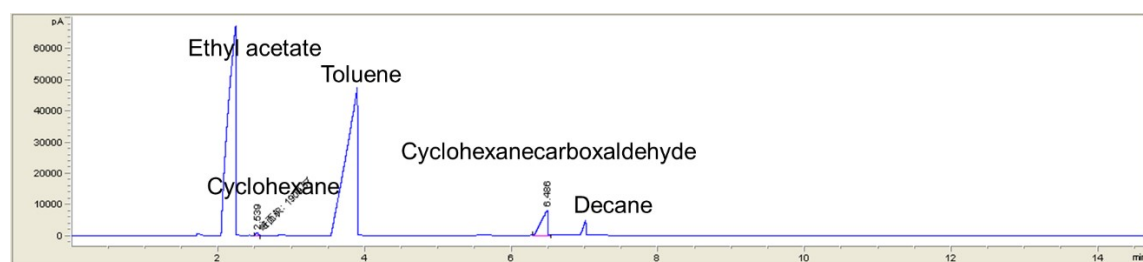

| Peak No. | Ret. time | Area    | Area%    |
|----------|-----------|---------|----------|
| 1        | 2.639     | 1909.9  | 3.844    |
| 2        | 6.486     | 47770.6 | 96.156   |
| Total    |           | 49680.5 | 100.0000 |

Pruduct (7)

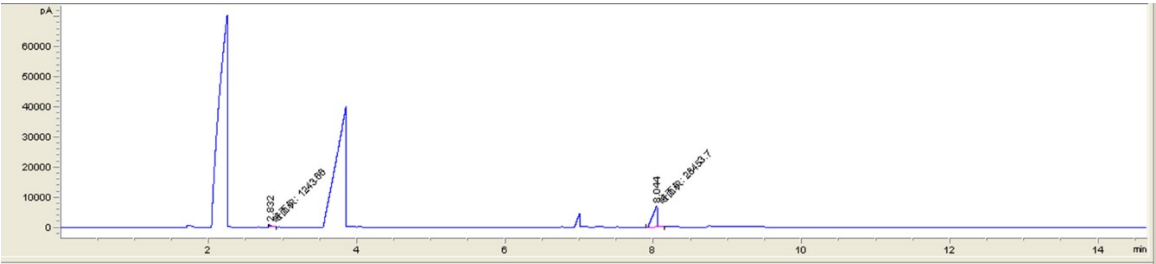

| Peak No. | Ret. time | Area    | Area%    |
|----------|-----------|---------|----------|
| 1        | 2.832     | 1243.7  | 4.188    |
| 2        | 8.044     | 28453.7 | 95.812   |
| Total    |           | 29697.4 | 100.0000 |

Pruduct (8)

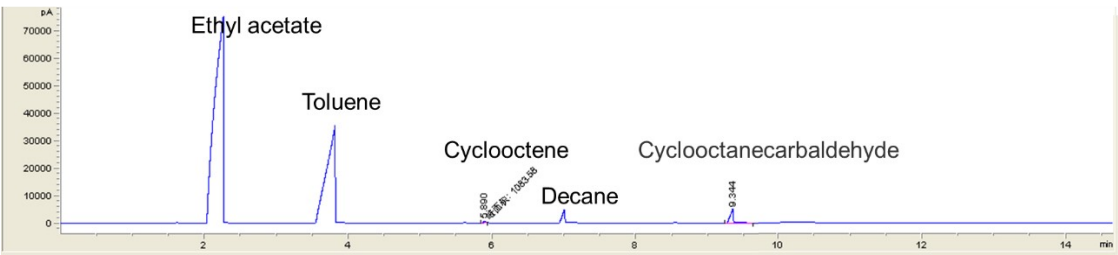

| Peak No. | Ret. time | Area    | Area%    |
|----------|-----------|---------|----------|
| 1        | 5.89      | 1083.6  | 6.467    |
| 2        | 9.344     | 15670.8 | 93.533   |
| Total    |           | 16754.4 | 100.0000 |

# Product (9)

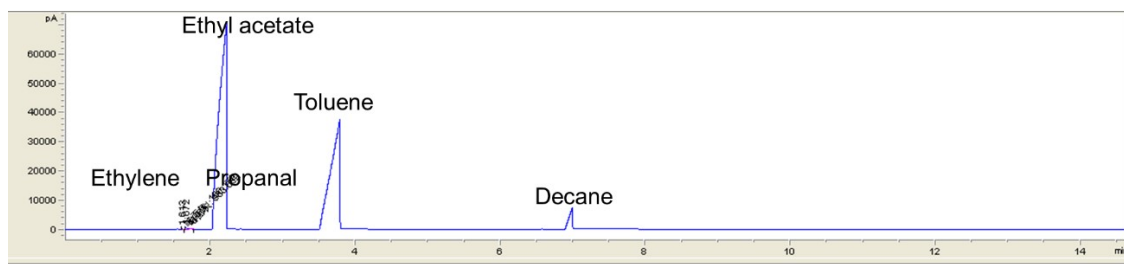

| Peak No. | Ret. time | Area   | Area%    |
|----------|-----------|--------|----------|
| 1        | 1.613     | 166.2  | 14.452   |
| 2        | 1.672     | 983.7  | 85.548   |
| Total    |           | 1149.9 | 100.0000 |

# Product (10)

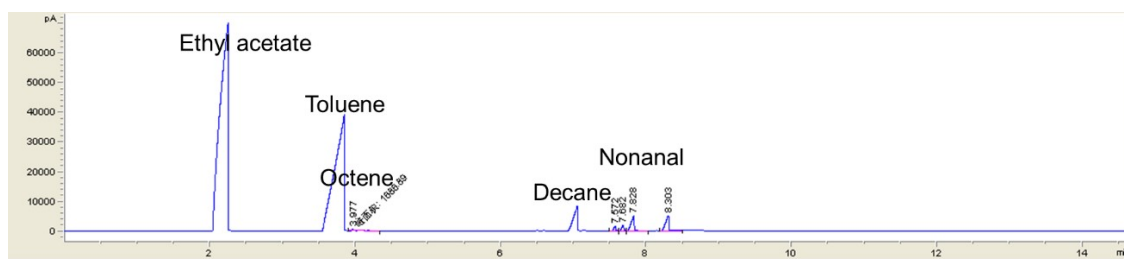

| Peak No. | Ret. time | Area    | Area%    |
|----------|-----------|---------|----------|
| 1        | 3.977     | 1686.9  | 4.305    |
| 2        | 7.572     | 2885.1  | 7.363    |
| 3        | 7.682     | 3779.9  | 9.847    |
| 4        | 7.828     | 14233.8 | 36.326   |
| 5        | 8.303     | 16597.7 | 42.359   |
| Total    |           | 1149.9  | 100.0000 |

# Pruduct (11)

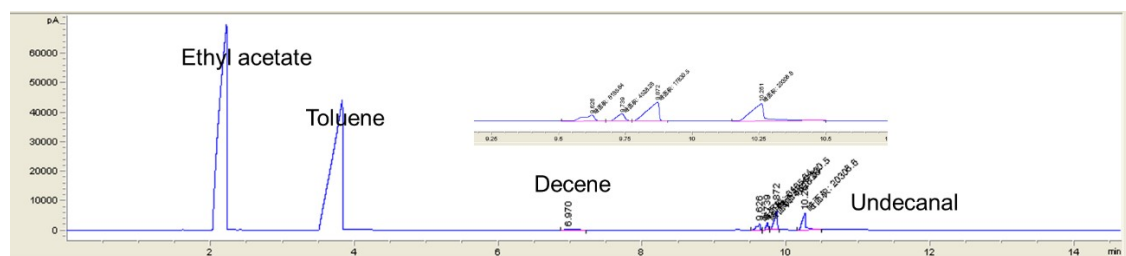

| Peak No. | Ret. time | Area    | Area%    |
|----------|-----------|---------|----------|
| 1        | 6.97      | 963.9   | 1.936    |
| 2        | 9.626     | 6165.6  | 12.382   |
| 3        | 9.739     | 4528.3  | 9.093    |
| 4        | 9.872     | 17830.5 | 35.806   |
| 5        | 10.261    | 20308.6 | 40.783   |
| Total    |           | 49796.9 | 100.0000 |

# Pruduct (12)

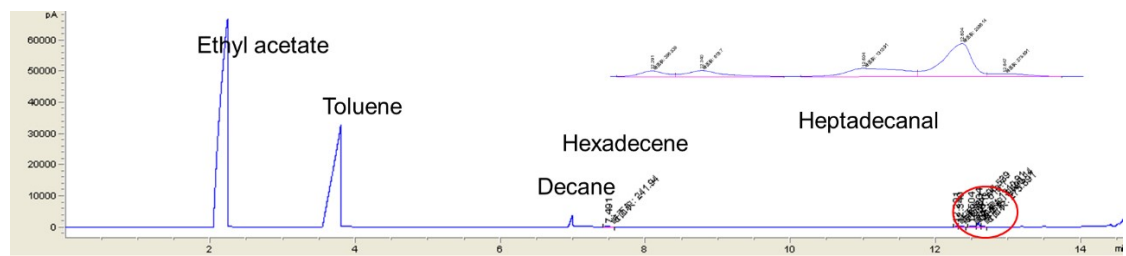

| Peak No. | Ret. time | Area   | Area%    |
|----------|-----------|--------|----------|
| 1        | 7.491     | 241.9  | 4.449    |
| 2        | 12.291    | 396.5  | 7.292    |
| 3        | 12.34     | 616.7  | 11.340   |
| 4        | 12.504    | 1310.9 | 24.106   |
| 5        | 12.604    | 2596.1 | 47.740   |
| 6        | 12.647    | 275.9  | 5.073    |
| Total    |           | 5438   | 100.0000 |

# Pruduct (13)

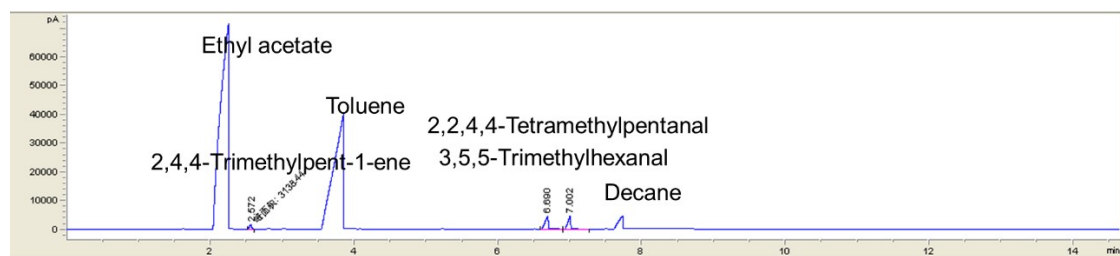

| Peak No. | Ret. time | Area    | Area%    |
|----------|-----------|---------|----------|
| 1        | 2.572     | 3138.4  | 10.904   |
| 2        | 6.69      | 13756.4 | 47.795   |
| 3        | 7.002     | 11887.3 | 41.301   |
| Total    |           | 28782.1 | 100.0000 |

# Pruduct (14)

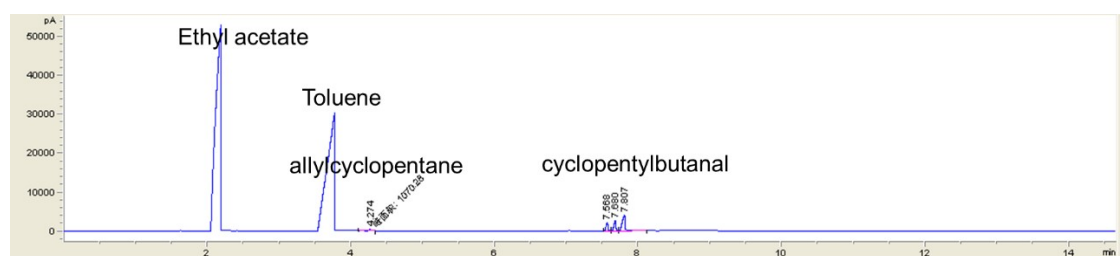

| Peak No. | Ret. time | Area    | Area%    |
|----------|-----------|---------|----------|
| 1        | 4.274     | 1070.3  | 5.068    |
| 2        | 7.568     | 3767.4  | 17.841   |
| 3        | 7.68      | 5098.3  | 24.143   |
| 4        | 7.807     | 11180.9 | 52.948   |
| Total    |           | 21116.9 | 100.0000 |

## 8. Quantitative NMR spectra of the products

Product (15)

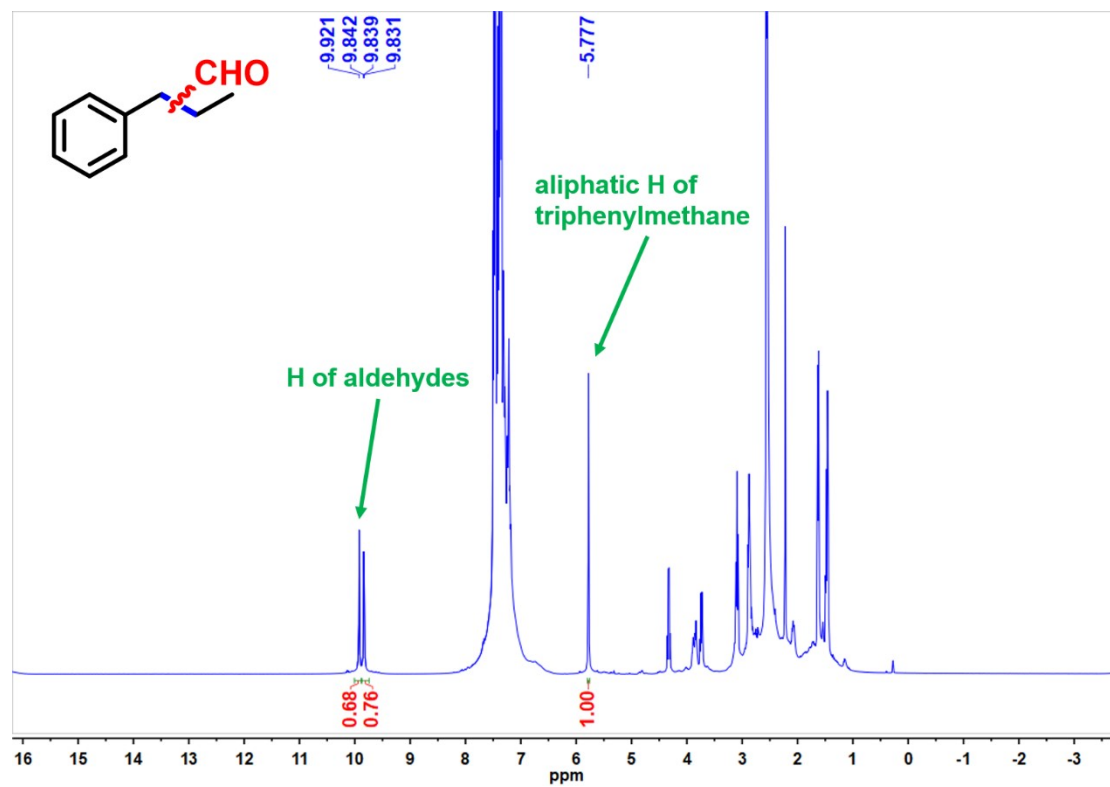

Product (16)

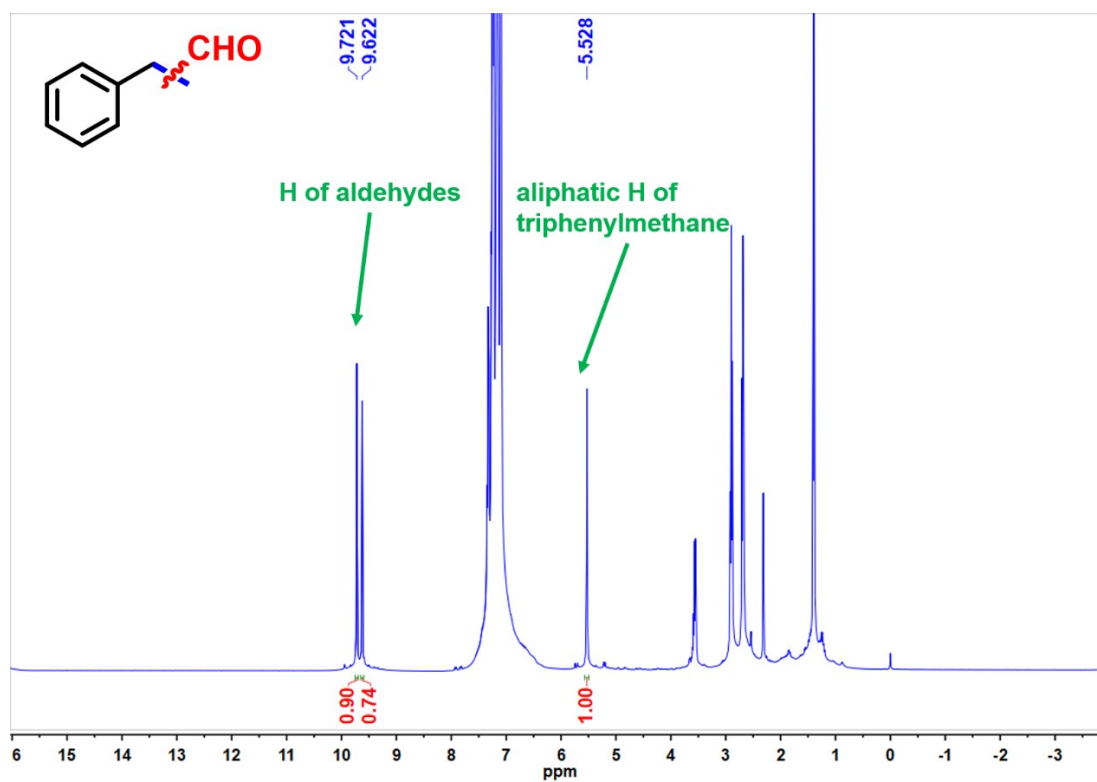

Product (17)

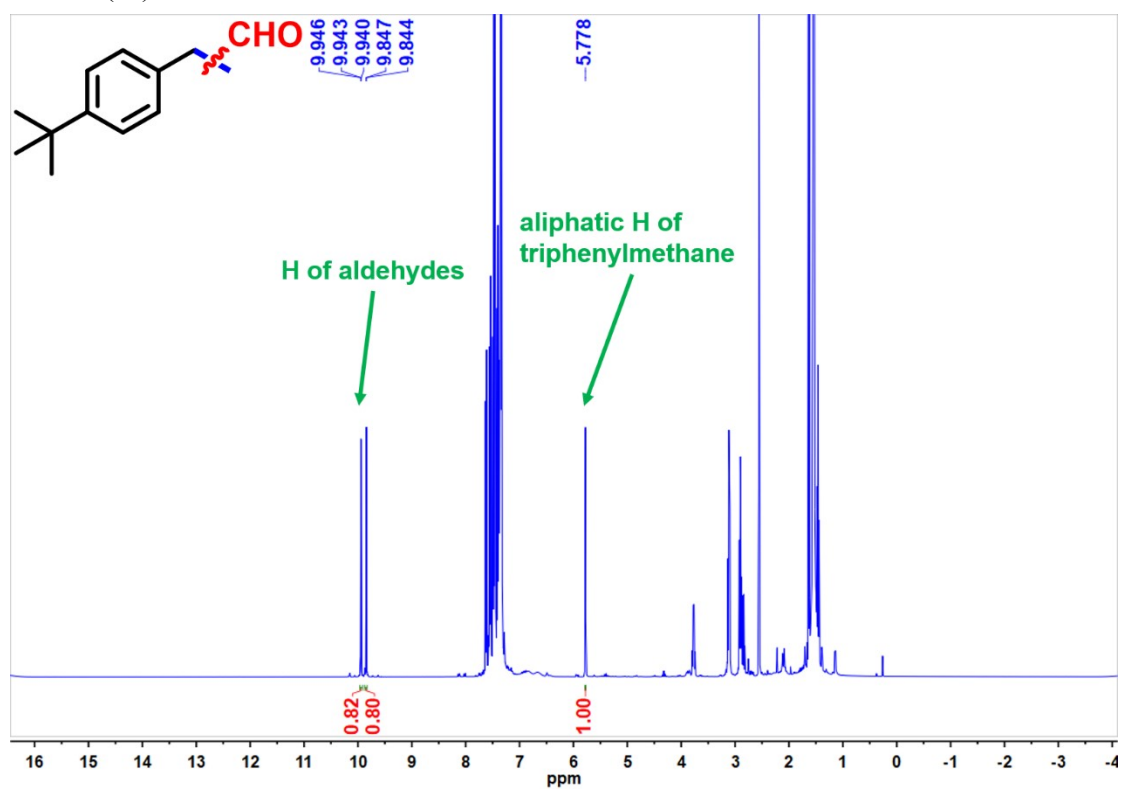

Product (18)

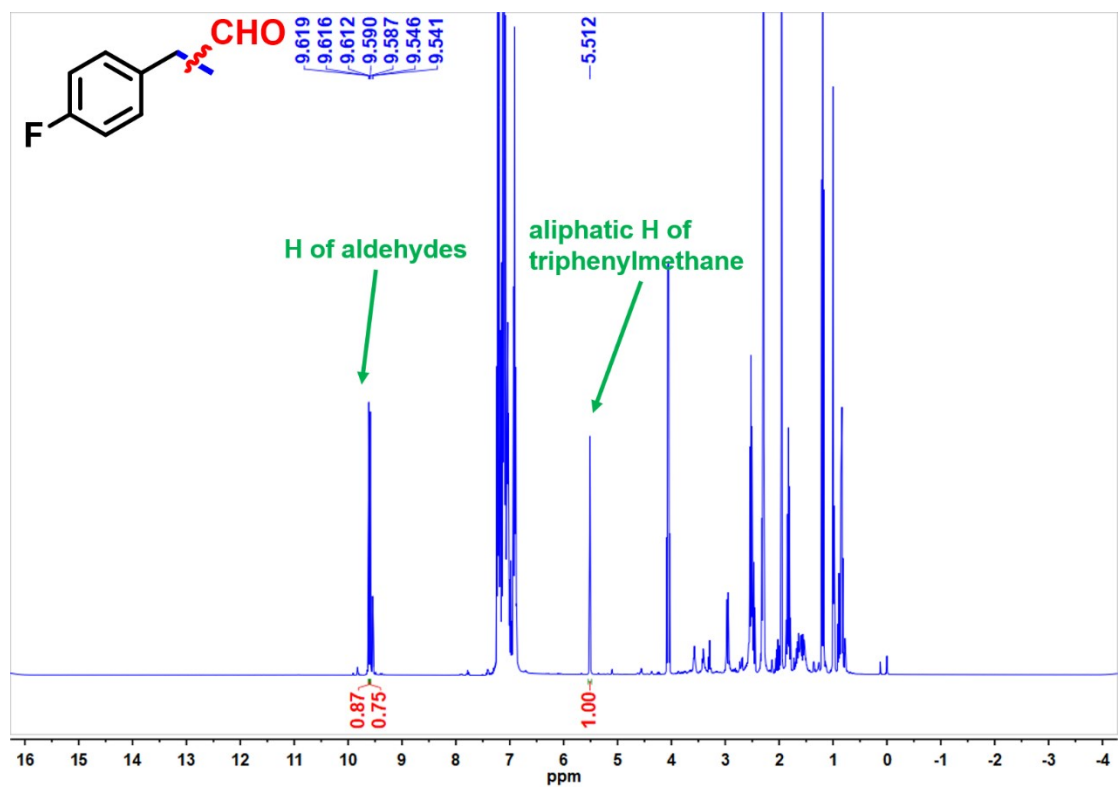

Product (19)

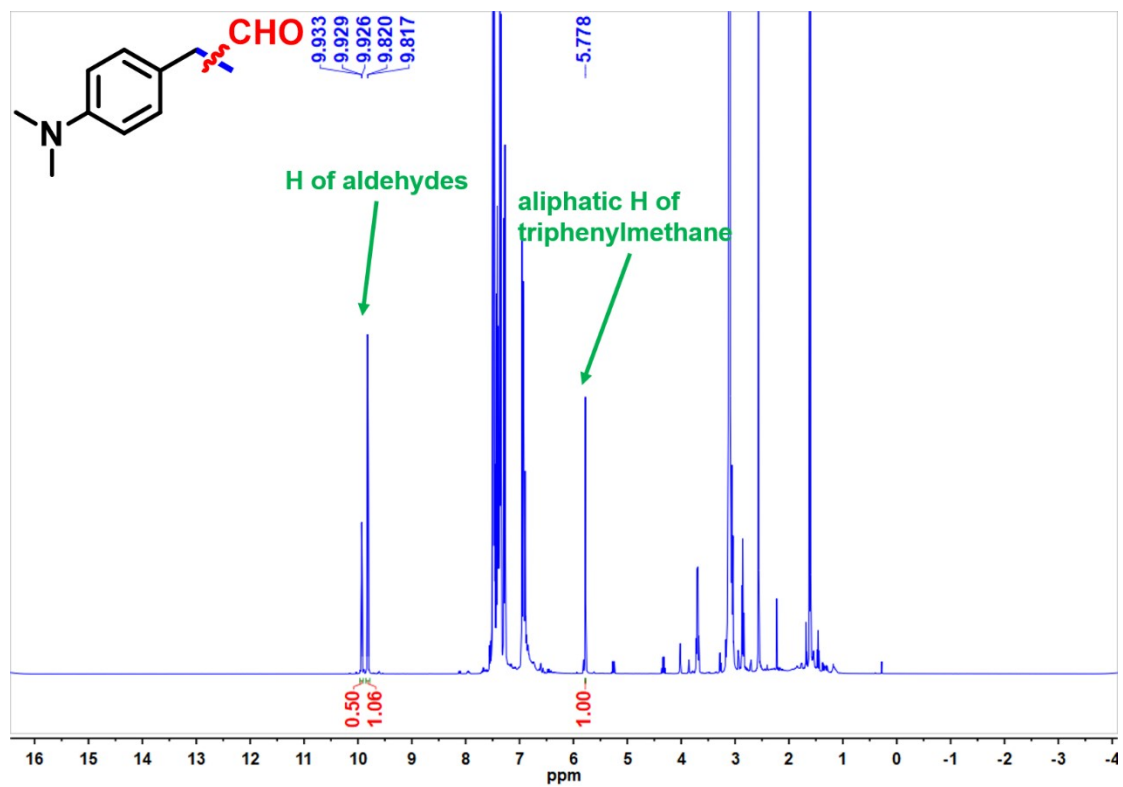

Product (20)

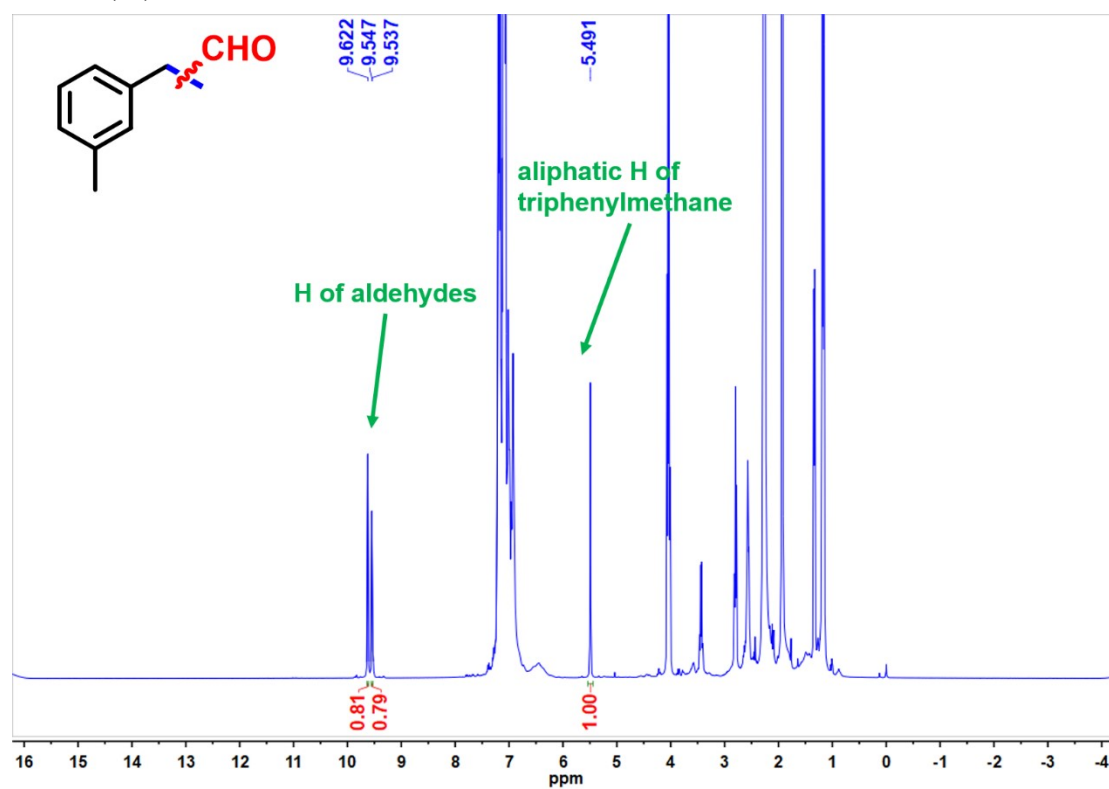

Product (21)

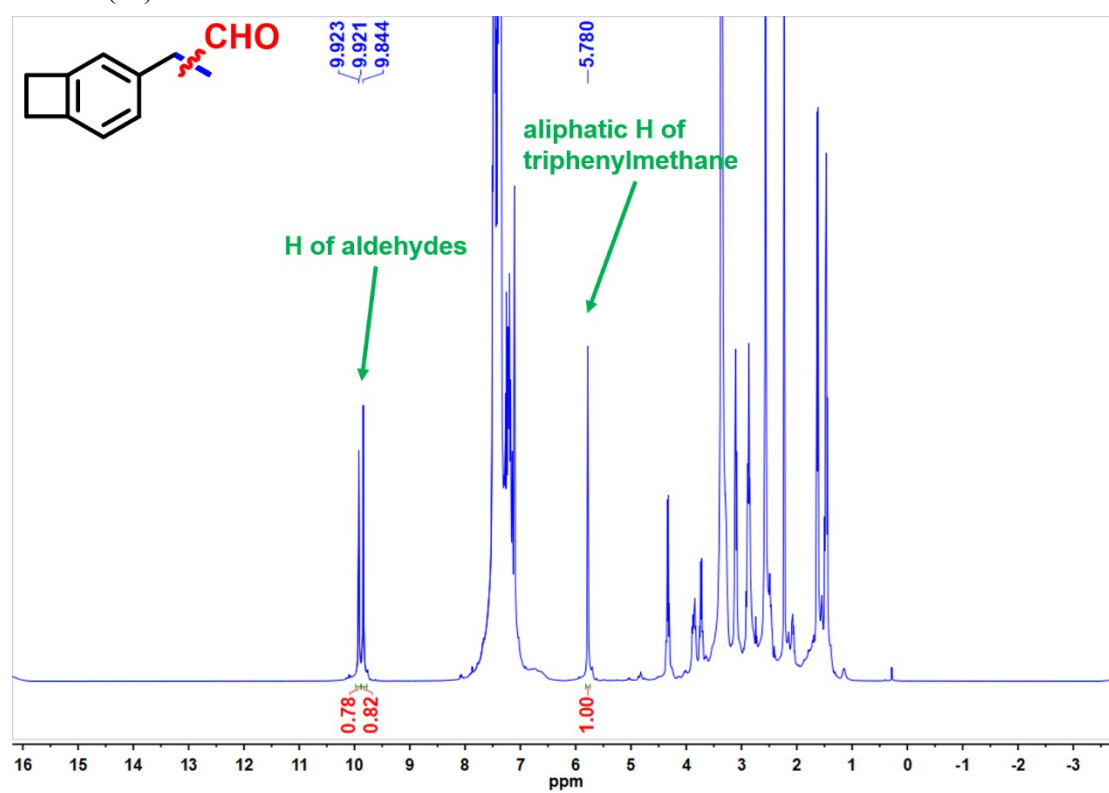

Product (22)

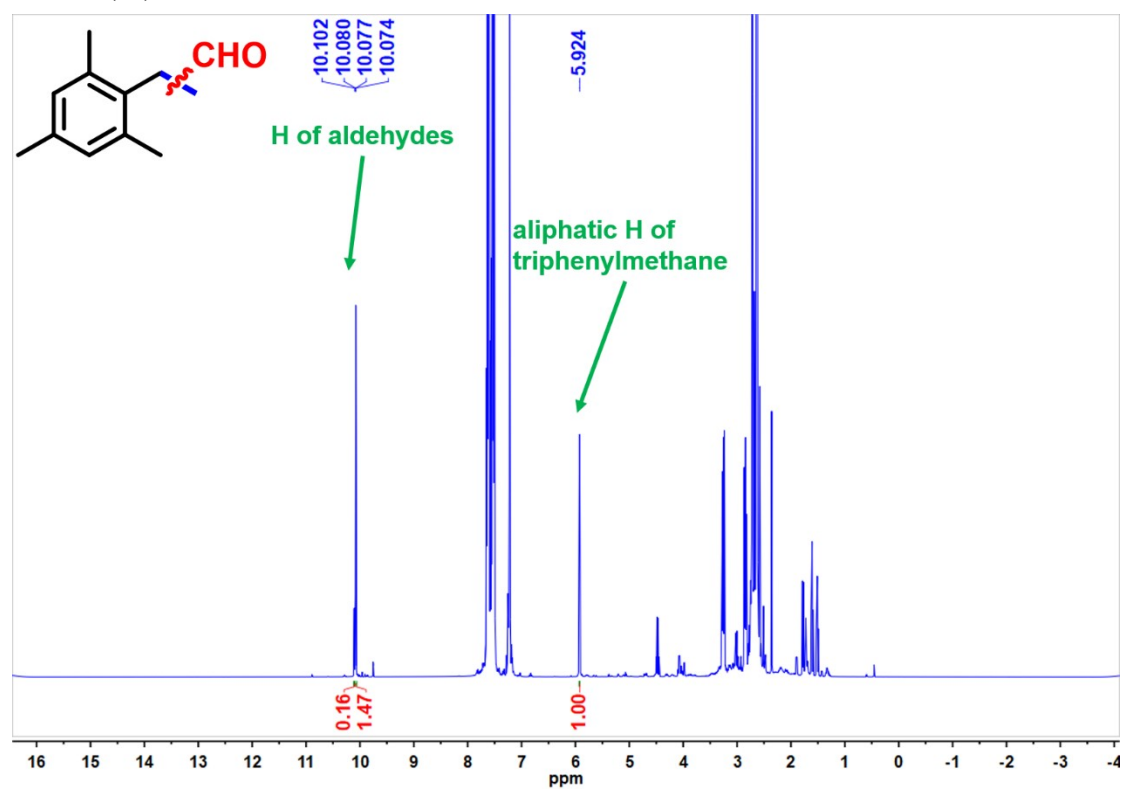

Product (23)

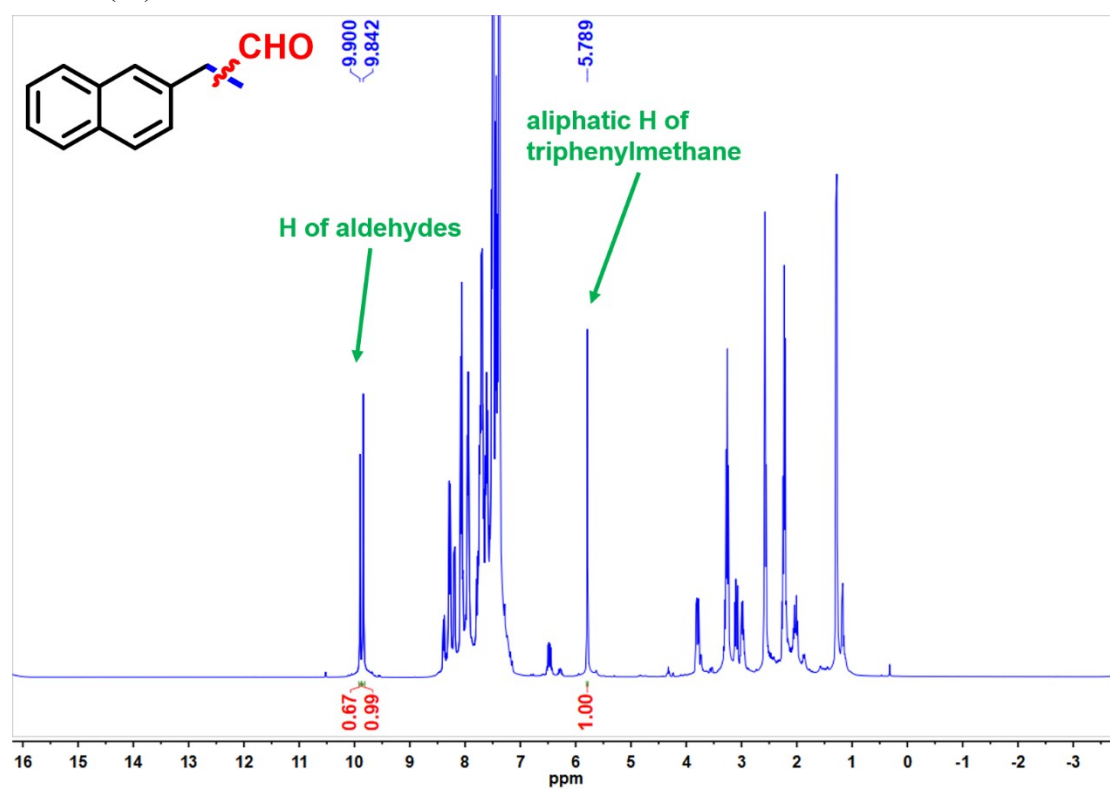

Product (24)

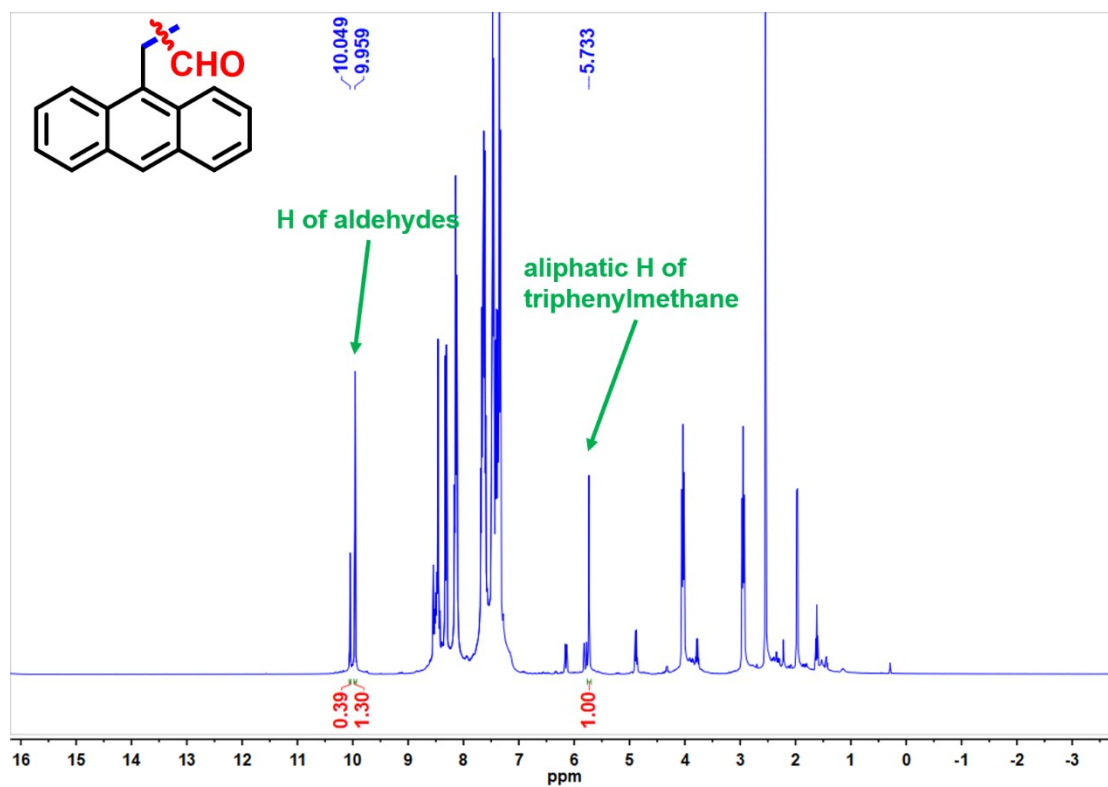

Product (25)

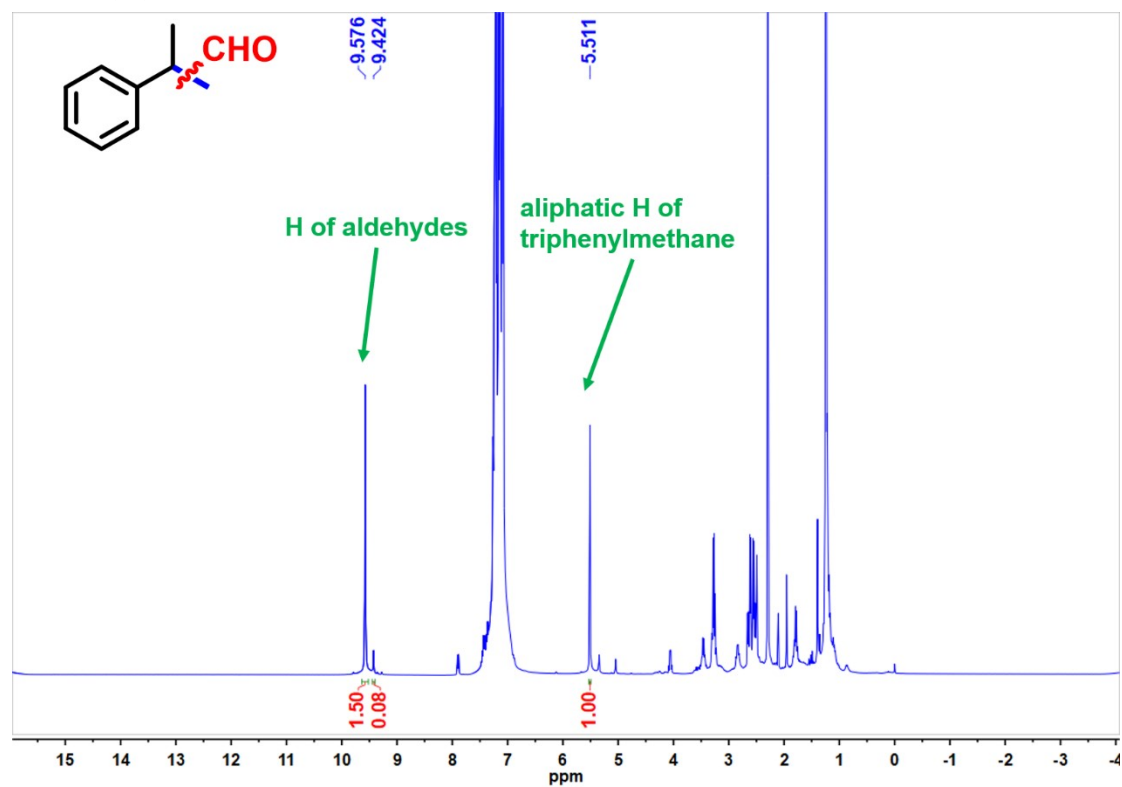

Product (26)

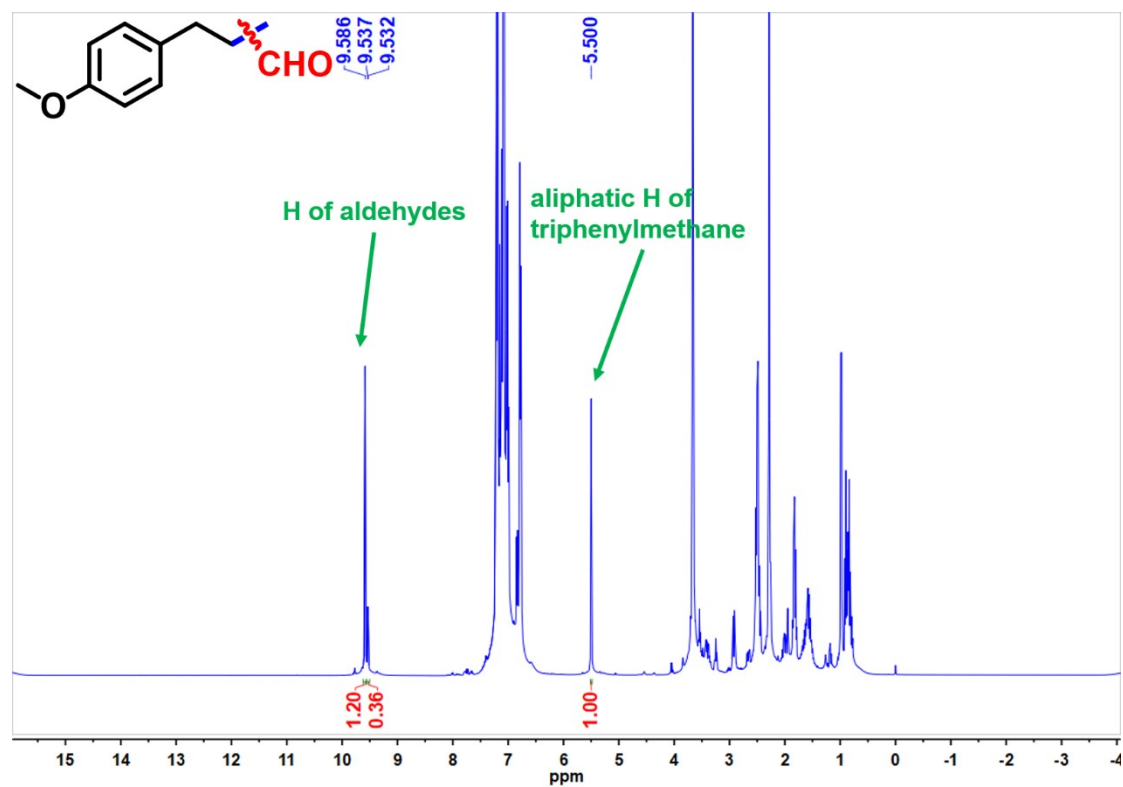

Product (27)

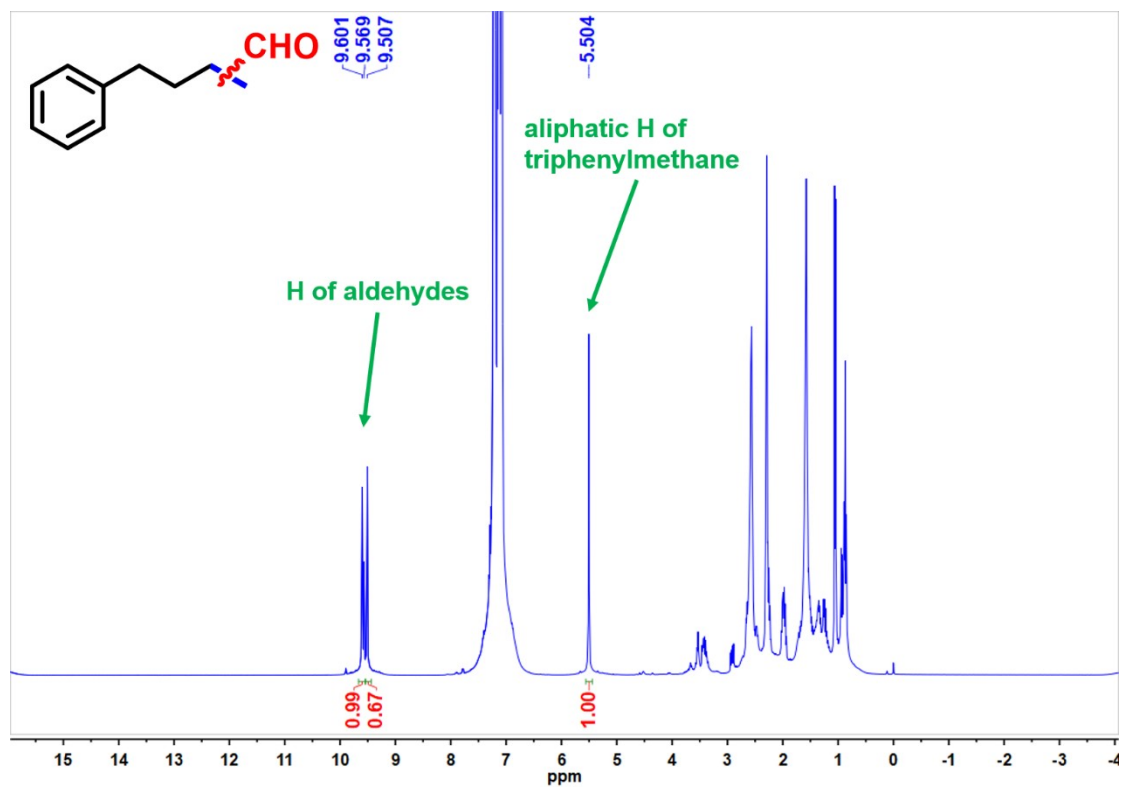

Product (28)

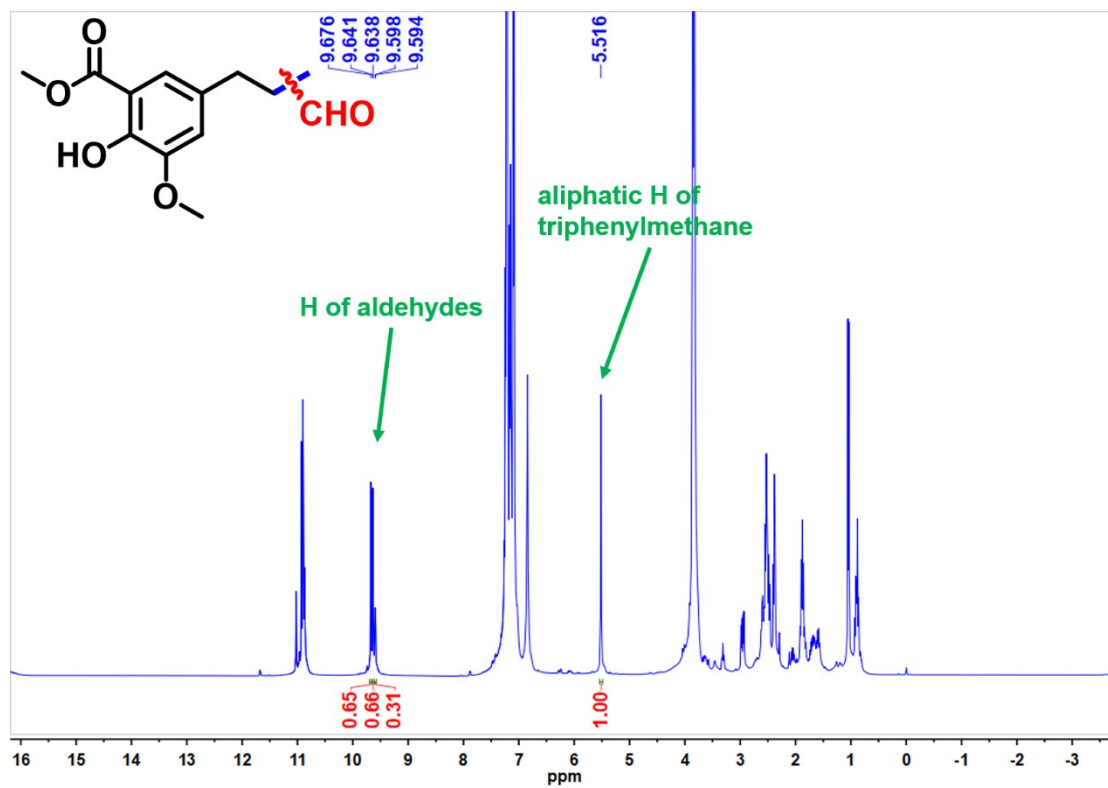

Product (29)

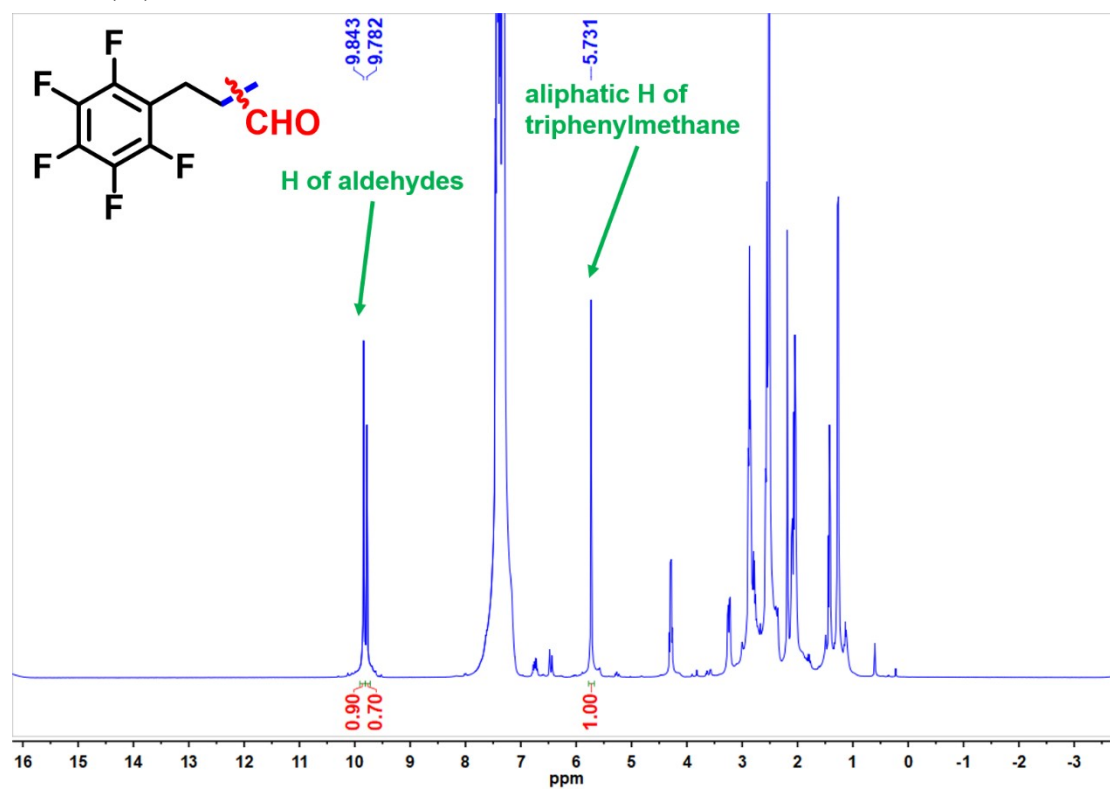

## References

- [1] M. Tan, G. Yang, T. Wang, T. Vitidsant, J. Li, Q. Wei, P. Ai, M. Wu, J. Zheng, N. Tsubaki, *Catal. Sci. Technol* **2016**, 6, 1162-1172.
- [2] Y. Sun, J. Harloff, H. Kosslick, A. Schulz, C. Fischer, S. Bartling, M. Frank, A. Springer, *Molecular Catalysis* **2022**, 517, 112005.
- [3] D. Sharma, V. Ganesh, A. Sakthivel, *Appl Catal A-gen.* **2018**, 555, 155-160.
- [4] M. Pilaski, J. Artz, H.-U. Islam, A. M. Beale, R. Palkovits, *Microporous Mesoporous Mater.* **2016**, 227, 219-227.
- [5] Q. Sun, Z. Dai, X. Liu, N. Sheng, F. Deng, X. Meng, F.-S. Xiao, *J. Am. Chem. Soc.* **2015**, 137, 5204-5209.
- [6] B. Wei, X. Liu, K. Hua, Y. Deng, H. Wang, Y. Sun, *ACS Appl. Mater. Interfaces* **2021**, 13, 15113-15121.
- [7] L. Chen, J. Tian, H. Song, Z. Gao, H. Wei, W. Wang, W. Ren, *RSC Advances* **2020**, 10, 34381-34386.
- [8] G. Zeng, Y. Zheng, G. He, C. Zhang, H. Chen, L. Liang, P. Liu, J. Ma, Z. Dong, *Industrial & Engineering Chemistry Research* **2024**, 63, 2958-2968.
- [9] T. Li, F. Chen, R. Lang, H. Wang, Y. Su, B. Qiao, A. Wang, T. Zhang, *Angew. Chem. Int. Ed.* **2020**, 59, 7430-7434.
- [10] R. Abu-Reziq, H. Alper, D. Wang, M. L. Post, *J. Am. Chem. Soc.* **2006**, 128, 5279-5282.
- [11] V. Zakharov, Y. Kardasheva, V. Chernyshev, M. Terenina, K. Kalmykov, D. Ovsyannikov, S. Savilov, S. Filippova, E. Karakhanov, S. Dunaev, L. Aslanov, *Molecular Catalysis* **2023**, 550, 113598.
- [12] C. Cai, S. Yu, G. Liu, X. Zhang, X. Zhang, *Adv. Synth. Catal.* **2011**, 353, 2665-2670.
